# Supplementary material for: Fulleropeptide esters as potential self-assembled antioxidants
Source: publisher site journal article supplement (doi:10.3762/bjnano.6.107), 2015-04-27
Supplement: Additional file 1 [file 2190-4286-6-107-S1.pdf]

# **Supporting Information**

**for**

## **Fulleropeptide esters as potential self-assembled antioxidants**

Mira S. Bjelaković<sup>\*1</sup>, Tatjana J. Kop<sup>1</sup>, Jelena Đorđević<sup>2</sup> and Dragana R. Milić<sup>\*2</sup>

Address: <sup>1</sup>Institute of Chemistry, Technology and Metallurgy, Center for Chemistry,  
University of Belgrade, Njegoševa 12, P.O. Box 473, 11001 Belgrade, Serbia and

<sup>2</sup>Faculty of Chemistry, University of Belgrade, Studentski trg 12–16, P.O. Box 51, 11158  
Belgrade, Serbia

Email: Mira Bjelaković\* - mbjelak@chem.bg.ac.rs, Dragana Milić\* -

dmilic@chem.bg.ac.rs

\* Corresponding author

**SEM images of fullerene derivatives 1–12 (Figures S1 and S2)**

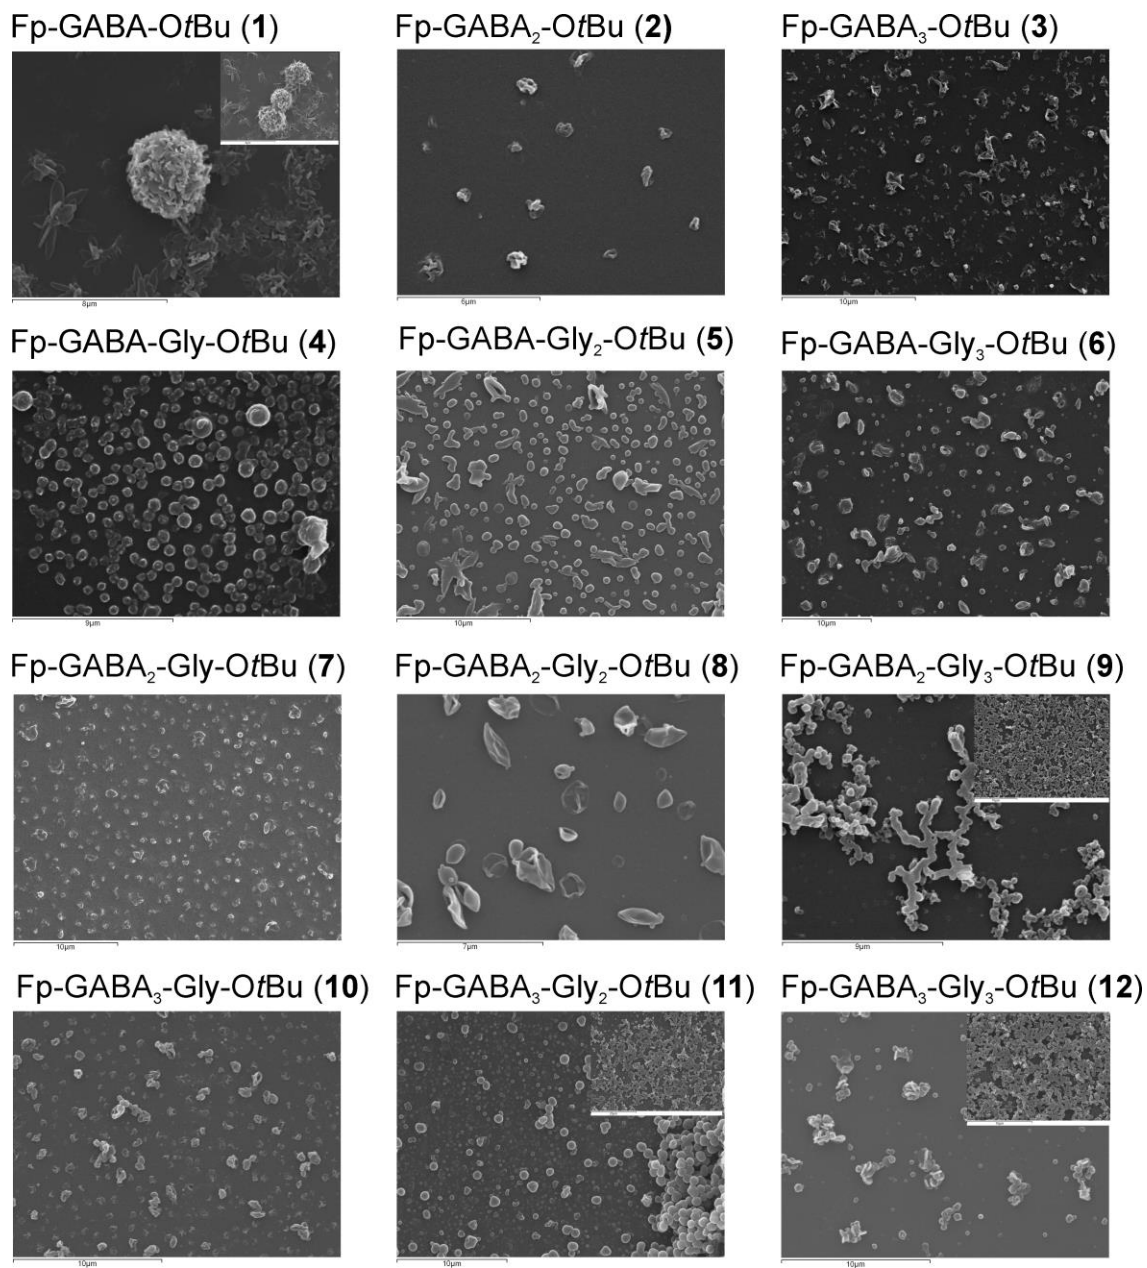

**Figure S1:** Representative SEM images of the self-organized particles of the parent ester **1** and fulleropeptide esters **2–12** prepared from PhMe/MeOH (5/1, v/v) on Si substrate upon evaporation of 10  $\mu$ L of 1 mM solution at room temperature; insets on **9**, **11** and **12**: 50  $\mu$ L of 1 mM solution.

Fp-GABA-OtBu (1)

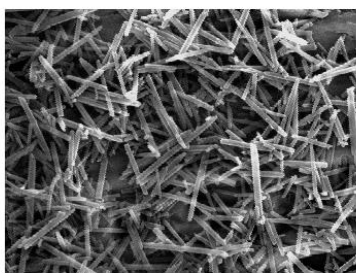

Fp-GABA<sub>2</sub>-OtBu (2)

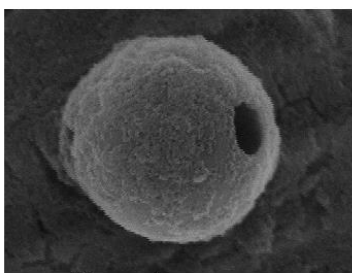

Fp-GABA<sub>3</sub>-OtBu (3)

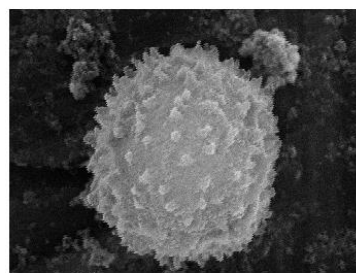

Fp-GABA-Gly-OtBu (4)

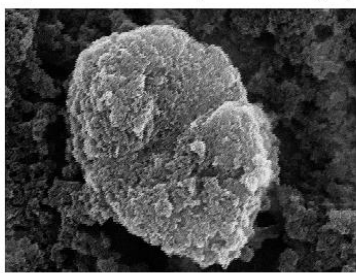

Fp-GABA-Gly<sub>2</sub>-OtBu (5)

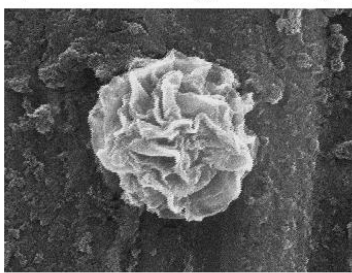

Fp-GABA-Gly<sub>3</sub>-OtBu (6)

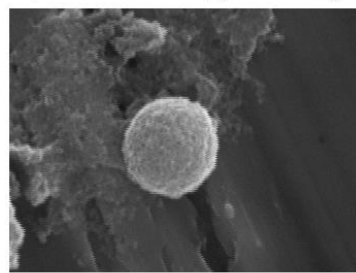

Fp-GABA<sub>2</sub>-Gly-OtBu (7)

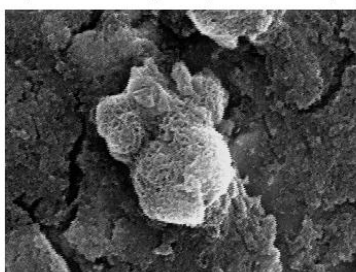

Fp-GABA<sub>2</sub>-Gly<sub>2</sub>-OtBu (8)

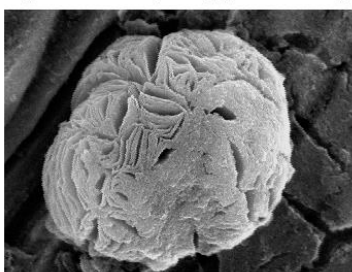

Fp-GABA<sub>2</sub>-Gly<sub>3</sub>-OtBu (9)

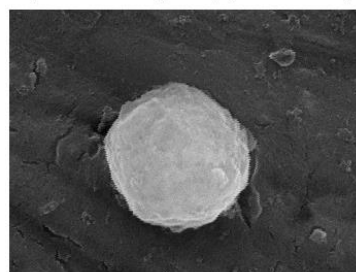

Fp-GABA<sub>3</sub>-Gly-OtBu (10)

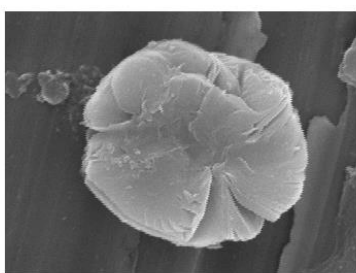

Fp-GABA<sub>3</sub>-Gly<sub>2</sub>-OtBu (11)

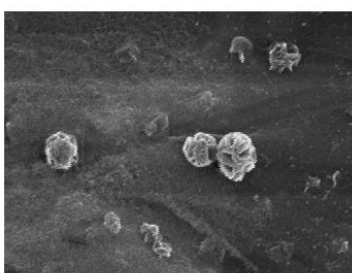

Fp-GABA<sub>3</sub>-Gly<sub>3</sub>-OtBu (12)

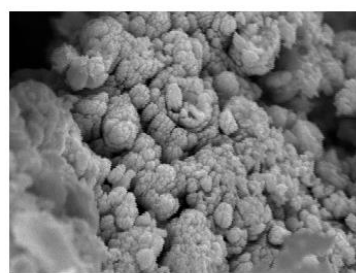

**Figure S2:** Representative SEM images of the self-organized particles of fulleropyrrolidinic GABA ester **1** and fulleropeptide esters **2–12** prepared from the solids obtained by precipitation with MeOH and deposited on brass substrate.
